# Supplementary material
Source: MDPI journal article supplement (https://www.mdpi.com/2075-4663/11/8/150)
Supplement: s1 [file s1]

Archive with 1 entries (1 files):
- sports-2492674-supplementary.pdf
