# Supplementary material for: Plyometric Jump Training Exercise Optimization for Maximizing Human Performance: A Systematic Scoping Review and Identification of Gaps in the Existing Literature
Source: MDPI journal article supplement (doi:10.3390/sports11080150), 2023-08-09
Supplement: s1 [file s1 › sports-2492674-supplementary.pdf]

## Electronic Supplementary Material Table S1

Table S1. Search strategy (code line) for each database and background of search history.

|                                                                                                 |                                                                                                                                                                                                                                                                                                                                                  |                                                                                                                      |                                                                                                                                       |
|-------------------------------------------------------------------------------------------------|--------------------------------------------------------------------------------------------------------------------------------------------------------------------------------------------------------------------------------------------------------------------------------------------------------------------------------------------------|----------------------------------------------------------------------------------------------------------------------|---------------------------------------------------------------------------------------------------------------------------------------|
| <b>Date of the search</b>                                                                       | July, 2017                                                                                                                                                                                                                                                                                                                                       | July, 2019                                                                                                           | September, 2021                                                                                                                       |
| <b>Databases</b>                                                                                | PubMed                                                                                                                                                                                                                                                                                                                                           | PubMed, WOS (Core Collection), Scopus                                                                                | PubMed, WOS (Core Collection <sup>a</sup> ), Scopus                                                                                   |
| <b>Keywords</b>                                                                                 | “plyometric”, “training”                                                                                                                                                                                                                                                                                                                         | “ballistic”, “complex”, “cycle”, “explosive”, “force”, “plyometric”, “shortening”, “stretch”, “training”, “velocity” | “ballistic”, “complex”, “cycle”, “explosive”, “force”, “jump”, “plyometric”, “power”, “shortening”, “stretch”, “training”, “velocity” |
| <b>Database fields for the search</b>                                                           | All                                                                                                                                                                                                                                                                                                                                              | PubMed: all<br><br>WOS: all<br><br>Scopus: title, abstract, keywords                                                 | PubMed: all <sup>b</sup><br><br>WOS: all <sup>b</sup><br><br>Scopus: title, abstract, keywords <sup>b</sup>                           |
| <b>Restrictions for the search</b>                                                              | None                                                                                                                                                                                                                                                                                                                                             | None                                                                                                                 | None                                                                                                                                  |
| <b>Examples of search strategy code line</b>                                                    | Pubmed: "plyometric exercise"[MeSH Terms] OR ("plyometric"[All Fields] AND "exercise"[All Fields]) OR "plyometric exercise"[All Fields] OR ("plyometric"[All Fields] AND "training"[All Fields]) OR "plyometric training"[All Fields]<br><br>WOS: (ALL=(plyometric)) AND ALL=(training)<br><br>SCOPUS: TITLE-ABS-KEY ( plyometric AND training ) |                                                                                                                      |                                                                                                                                       |
| <sup>a</sup> : except for the keywords “jump” and “power” searched in all WOS databases.        |                                                                                                                                                                                                                                                                                                                                                  |                                                                                                                      |                                                                                                                                       |
| <sup>b</sup> : except for the keywords “jump” and “power” searched in the database field TITLE. |                                                                                                                                                                                                                                                                                                                                                  |                                                                                                                      |                                                                                                                                       |

## Electronic Supplementary Material S 2

Supplementary material 2. Exclusion reasons for studies included in the preliminary qualitative synthesis.

| Study                                    | Reason                                                                                                                                                                                                                                                                                                            |
|------------------------------------------|-------------------------------------------------------------------------------------------------------------------------------------------------------------------------------------------------------------------------------------------------------------------------------------------------------------------|
| Aminae et al. (2017) [1]                 | Exercise interventions perform different numbers of total jumps (e.g., 972 vs 135) and combined with different types of training (e.g., no resistance training vs resistance training)                                                                                                                            |
| Arazi et al. (2012) [2]                  | Exercise interventions compared two types of surfaces (e.g., mat vs aquatic).                                                                                                                                                                                                                                     |
| Blazevich et al. (2003) [3]              | Exercise interventions combined with other different types of training and was impossible to determine why improvements occur (e.g., squat + sprint vs forward hack squat + sprint vs sprint).                                                                                                                    |
| Carlson et al. (2009) [4]                | The study presents methodological limitations, and the subjects' characteristics are poorly described, was impossible to determine why improvements occur.                                                                                                                                                        |
| Chakshuraksha and Apanukul [5]           | Exercise interventions used the same type of jump (e.g., CMJ) and combined with other different types of training (e.g., resistance training complex vs resistance training complex with accentuated eccentric loading).                                                                                          |
| Chaouachi et al. (2014) [6]              | Exercise interventions combined with other types of training, and it was impossible to determine why improvements occur (e.g., none vs balance training).                                                                                                                                                         |
| Chmielewski et al. (2016) [7]            | Anterior cruciate ligament reconstruction patients were the sample of the study. Exercise interventions used the same type of jumps and varied training intensity (e.g., low vs high).                                                                                                                            |
| Ciacchi and Bartolomei (2018) [8]        | Exercise interventions combined with other types of training made it impossible to determine why improvements occurred (e.g., hang-clean vs half squat).                                                                                                                                                          |
| Coratella et al. (2018) [9]              | Exercise interventions perform a different number of total jumps (e.g., 800 vs 656)                                                                                                                                                                                                                               |
| Elias et al. (2018) [10]                 | Exercise interventions variables were too different to compare the type of jumps: number of total jumps (e.g., 1600 vs 3080), intensity (e.g., max vs decrease during tapering) and progressive overload (e.g., volume + technique vs volume + technique + intensity)                                             |
| Escobar et al. (2020) [11]               | Exercise interventions used the same type of jump (e.g., squat jumps, CMJs and single-leg CMJs) and combined with other different types of training (e.g., squat + deadlifts + leg press vs squat + leg press).                                                                                                   |
| Escobar et al. (2022) [12]               | Exercise interventions used the same type of jumps and perform a different number of total jumps (e.g., 2160 vs 540)                                                                                                                                                                                              |
| Escriva-Selles and Gonzalez-Badillo [13] | Several differences between groups to make comparison (e.g., number of total jumps, intensity, progressive overload, combined one group with RT etc.)                                                                                                                                                             |
| Fathi et al. (2019) [14]                 | No clearly reported type of jump training, additionally, exercise interventions combined with other types of training, and it was impossible to determine why improvements occur (e.g., resistance training vs none).                                                                                             |
| Fatourus et al. (2000) [15]              | Exercise interventions combined with other types of training, and it was impossible to determine why improvements occur (e.g., resistance training vs none).                                                                                                                                                      |
| Fowler et al. (1995) [16]                | Several differences between groups to make the comparison (e.g., number of total jumps, 222 loaded jump squats vs 105 loaded jump squats + 399 pendulum jumps, intensity, progressive overload, combined with RT and other with RT and feedback, etc.)                                                            |
| Gauffin et al. (1989) [17]               | Exercise interventions perform a different number of total jumps (e.g., 1440 vs 1320)                                                                                                                                                                                                                             |
| Gonzalo Skok et al. (2017) [18]          | Exercise interventions involving jump training programs representing less than 50% of the total training load when delivered in conjunction with other training interventions (e.g., backward lunges, defensive-like shuffling steps, side-step, crossover cutting, lateral crossover cutting and lateral squat). |
| Hammami et al. (2019) [19]               | Several differences between experimental groups make comparisons difficult (e.g., number of total jumps, combined training, tapering, etc.). Additionally, the statistical presentation of the information was poorly reported.                                                                                   |

|                                  |                                                                                                                                                                                                                                                                             |
|----------------------------------|-----------------------------------------------------------------------------------------------------------------------------------------------------------------------------------------------------------------------------------------------------------------------------|
| Helland et al. (2017) [20]       | Comparison between exercise groups in the number of total jumps was too different (e.g., 635 vs 760) and combined training was different (e.g., RT + feedback vs RT).                                                                                                       |
| Hortobagyi et al. (1991) [21]    | Comparison between exercise groups in the number of total jumps was too different (e.g., 2280 vs 820). (PDF not found)                                                                                                                                                      |
| Huang et al. (2021) [22]         | Exercise interventions combined with other types of training, and it was impossible to determine why improvements occur (e.g., none vs balance training). Consequently, the number of total jumps between groups was different (e.g., 2652 vs 1776).                        |
| Huang et al. (2014) [23]         | Exercise interventions combined with other types of training, and it was impossible to determine why improvements occur (e.g., none vs balance training). Consequently, the number of total jumps between groups was different (e.g., 2736 vs 1776).                        |
| Huang and Lin (2010) [24]        | Exercise interventions combined with other types of training, and it was impossible to determine why improvements occur (e.g., none vs balance training).                                                                                                                   |
| Jafari et al. (2013) [25]        | All exercise interventions participated in the same training program. In general, type of training is poorly described.                                                                                                                                                     |
| Jiménez-Reyes et al. (2019) [26] | Impossible to make comparisons due to the highly individualized training program regarding training variable moderators.                                                                                                                                                    |
| Jiménez-Reyes et al. (2017) [27] | Not clearly reported the type of jump training along the exercise intervention groups.                                                                                                                                                                                      |
| Kamalakkannan et al. (2011) [28] | Both exercise intervention groups perform the same type of jump training. Comparison of this study is with or without resistance aquatic plyometric training.                                                                                                               |
| Kamandulis et al. (2012) [29]    | Only one exercise intervention group, impossible to make comparisons.                                                                                                                                                                                                       |
| Kamandulis et al. (2012) [30]    | Both exercise intervention groups perform the same type of jump training. Several differences between groups to make comparison (e.g., number of total jumps, intensity, training duration, etc.)                                                                           |
| Kasmi et al. (2021) [31]         | This study compared a group that performed jump training with other that performed jump training + eccentric training. Groups performed different number of total jumps (e.g., 1040 vs 384)                                                                                 |
| Katsikari et al. (2020) [32]     | Only one exercise intervention group, impossible to make comparisons.                                                                                                                                                                                                       |
| Keller et al. (2020) [33]        | Several differences between groups to make the comparison (e.g., number of total jumps, 640-1120 vs 608-740, progressive overload, combined with COD and other no combined, etc.)                                                                                           |
| Kukric et al. (2012) [34]        | This study compared a group that performed jump training with other that performed jump training + resistance training. Groups performed different number of total jumps (e.g., 1920 vs 4200)                                                                               |
| Lievens et al. (2021) [35]       | Exercise intervention groups perform the same type of jump training, except for one group that performed only 4 of 8 drills of the other groups. Several differences between groups to make comparison (e.g., number of total jumps, intensity, progressive overload, etc.) |
| Lindberg et al. (2021) [36]      | This study compared a group that performed jump training + balance strength training with other that performed jump training + velocity training. Groups performed different number of total jumps (e.g., 1700 vs 2000).                                                    |
| Lloyd et al. (2016) [37]         | This study compared a group that performed jump training with other that performed jump training + resistance training. Groups performed different number of total jumps (e.g., 958 vs 486)                                                                                 |
| Lyttle et al. (1996) [38]        | Several differences between groups to make the comparison (e.g., number of total jumps, 496- vs 31, progressive overload, combined with RT and other upper body plyometrics, etc.)                                                                                          |
| Mero et al. (2021) [39]          | Effects of jump training cannot be isolated, as the lack of detailed information about jump training.                                                                                                                                                                       |
| Myklebust et al. (2003) [40]     | Mix a lot of type of trainings and jump training is not clearly reported, impossible to make comparisons.                                                                                                                                                                   |
| Ogiso and Miki (2020) [41]       | Effects of jump training cannot be isolated, one group performed electromyostimulation + RT probably vs no additional training.                                                                                                                                             |
| Pamuk et al. (2022) [42]         | The number of total jumps was too different (e.g., 2424 vs 1944)                                                                                                                                                                                                            |
| Radnor et al. (2017) [43]        | This study compared a group that performed jump training with other that performed jump training + resistance training. Groups performed different number of total jumps (e.g., 958 vs 486)                                                                                 |

|                                     |                                                                                                                                                                                                                      |
|-------------------------------------|----------------------------------------------------------------------------------------------------------------------------------------------------------------------------------------------------------------------|
| Ramirez-Campillo et al. (2018) [44] | Differences in combined training: RT unilateral vs RT bilateral.                                                                                                                                                     |
| Rhea et al. (2008) [45]             | Several differences between experimental groups make comparisons difficult (e.g., number of total jumps, combined training, frequency, load, intensity, etc.). Methodological approach has many confusions.          |
| Rhea et al. (2008) [46]             | Several differences between experimental groups make comparisons difficult (e.g., number of total jumps, combined training, frequency, load, intensity, etc.). Methodological approach has many confusions.          |
| Saez de Villareal et al. 2015 [47]  | Authors applied 3 training interventions with different nature and characteristics (different volumes; exercises; environments such as water versus land, etc...), this make difficult to compare training outcomes. |
| Saez de Villareal et al. 2013 [48]  | Authors applied 3 training interventions with different volumes (e.g., 936 vs 321 vs 615), this make difficult to compare training outcomes (e.g., loaded vs unloaded and cyclic vs acyclic).                        |
| Saez de Villareal et al. 2011 [49]  | Authors applied 3 training interventions with different volumes (e.g., 936 vs 321 vs 615), this make difficult to compare training outcomes (e.g., loaded vs unloaded and cyclic vs acyclic).                        |
| Sanchez-Sanchez et al. 2021 [50]    | Both exercise intervention groups perform the same type of jump training. One performed during 3 weeks and the other performed during 6 weeks.                                                                       |
| Sánchez-Sixto et al. (2021) [51]    | This study compared a group that performed jump training with other that performed jump training + resistance training. Groups performed different number of total jumps (e.g., 330 vs 512)                          |
| Simpson et al. (2001) [52]          | This study compared an individualized vs non-individualized intensity with the same type of jumps. Groups performed different number of total jumps (e.g., 720 or less vs 216)                                       |
| Siti et al. (2014) [53]             | Groups performed different number of total jumps (e.g., 2520 vs 2808 vs 4140) and makes impossible comparison.                                                                                                       |
| Smilios et al. (2013) [54]          | Groups performed different number of total jumps (e.g., 360 repeated jumps + 300 loaded jumps vs 360 repeated jumps + 480 loaded jumps vs 360 repeated jumps) and makes impossible comparison.                       |
| Zaras et al. (2014) [55]            | This study showed different types of tapering but used the same type of jump training with differences between total number jumps (e.g., 300 vs 540).                                                                |

1. Yazdani S, Aminaei M, Amirseifadini M. Effects of plyometric and cluster resistance training on explosive power and maximum strength in karate players. *International Journal of Applied Exercise Physiology*. Asian Exercise and Sport Science Association; 2017;6.
2. Arazi H, Coetzee B, Asadi A. Comparative effect of land-and aquatic-based plyometric training on jumping ability and agility of young basketball players. *South African Journal for Research in Sport, Physical Education and Recreation*. North-West University; 2012;34:1–14.
3. Blazeovich AJ, Gill ND, Bronks R, Newton RU. Training-specific muscle architecture adaptation after 5-wk training in athletes. *Medicine and science in sports and exercise*. WILLIAMS & WILKINS; 2003;35:2013–22.
4. Carlson K, Magnusen M, Walters P. Effect of various training modalities on vertical jump. *Research in Sports Medicine*. Taylor & Francis; 2009;17:84–94.
5. Chakshuraksha P, Apanukul S. Effects of Accentuated Eccentric Loading Combined with Plyometric Training on Strength, Power, Speed, and Agility in Male Rugby Players. *Journal of Exercise Physiology Online*. 2021;24.
6. Chaouachi A, Othman AB, Hammami R, Drinkwater EJ, Behm DG. The combination of plyometric and balance training improves sprint and shuttle run performances more often than plyometric-only training with children. *The Journal of Strength & Conditioning Research*. LWW; 2014;28:401–12.
7. Chmielewski TL, George SZ, Tillman SM, Moser MW, Lentz TA, Indelicato PA, et al. Low-versus high-intensity plyometric exercise during rehabilitation after anterior cruciate ligament reconstruction. *The American journal of sports medicine*. SAGE Publications Sage CA: Los Angeles, CA; 2016;44:609–17.

8. Ciacchi S, Bartolomei S. The effects of two different explosive strength training programs on vertical jump performance in basketball. *The Journal of Sports Medicine and Physical Fitness*. 2017;58:1375–82.
9. Coratella G, Beato M, Milanese C, Longo S, Limonta E, Rampichini S, et al. Specific adaptations in performance and muscle architecture after weighted jump-squat vs. body mass squat jump training in recreational soccer players. *The Journal of Strength & Conditioning Research*. LWW; 2018;32:921–9.
10. Elias A. Sprungtraining nach Kreuzband-Rekonstruktion verbessert die physische Funktion.
11. Álvarez JAE, García JPF, Da Conceição FA, Jiménez-Reyes P. Individualized training based on force–velocity profiling during jumping in ballet dancers. *International Journal of Sports Physiology and Performance*. Human Kinetics; 2019;15:788–94.
12. Escobar-Álvarez JA, Jiménez-Reyes P, Da Conceição FA, Fuentes-García JP. Effect of Supplementary Physical Training on Vertical Jump Height in Professional Ballet Dancers. *International Journal of Sports Physiology and Performance*. Human Kinetics; 2022;17:1257–63.
13. Escrivá-Sellés F, González-Badillo J. Effect of two periods of power training on performance in the thrust, barracuda and boost exercises in synchronised swimming. *Apunts Ed Fis Deport*. 2020;142:35–45.
14. Fathi A, Hammami R, Moran J, Borji R, Sahli S, Rebai H. Effect of a 16-week combined strength and plyometric training program followed by a detraining period on athletic performance in pubertal volleyball players. *The Journal of Strength & Conditioning Research*. LWW; 2019;33:2117–27.
15. Fatouros IG, Jamurtas AZ, Leontsini D, Taxildaris K, Aggelousis N, Kostopoulos N, et al. Evaluation of plyometric exercise training, weight training, and their combination on vertical jumping performance and leg strength. *The Journal of Strength & Conditioning Research*. LWW; 2000;14:470–6.
16. Fowler NE, Trzaskoma Z, Wit A, Iskra L, Lees A. The effectiveness of a pendulum swing for the development of leg strength and counter-movement jump performance. *Journal of sports sciences*. Taylor & Francis; 1995;13:101–8.
17. Gauffin H, Ekstrand J, Arnesson L, Tropp H. Vertical jump performance in soccer players: a comparative study of two training programs. *Journal of Human Movement Studies*. 1989;16:215–24.
18. Gonzalo-Skok O, Tous-Fajardo J, Valero-Campo C, Berzosa C, Bataller AV, Arjol-Serrano JL, et al. Eccentric-Overload Training in Team-Sport Functional Performance: Constant Bilateral Vertical Versus Variable Unilateral Multidirectional Movements. *International Journal of Sports Physiology & Performance*. 2017;12.
19. Hammami M, Gaamouri N, Shephard RJ, Chelly MS. Effects of contrast strength vs. plyometric training on lower-limb explosive performance, ability to change direction and neuromuscular adaptation in soccer players. *The Journal of strength & conditioning research*. LWW; 2019;33:2094–103.
20. Helland C, Hole E, Iversen E, Olsson MC, Seynnes OR, Solberg PA, et al. Training strategies to improve muscle power: is olympic-style weightlifting relevant? *Ovid*; 2017;
21. Hortobagyi T, Sio A, Fodor T, Merkely B. Effects of targeted skill development and plyometric conditioning on long jump performance in 16-year-old boys. *Journal of Human Movement Studies*. TEVIOT-KIMPTON PUBLICATIONS 82 GREAT KING STREET, EDINBURGH, MIDLOTHIAN ...; 1991;21:1–17.
22. Huang P-Y, Jankaew A, Lin C-F. Effects of plyometric and balance training on neuromuscular control of recreational athletes with functional ankle instability: a randomized controlled laboratory study. *International journal of environmental research and public health*. Multidisciplinary Digital Publishing Institute; 2021;18:5269.
23. Huang P-Y, Chen W-L, Lin C-F, Lee H-J. Lower extremity biomechanics in athletes with ankle instability after a 6-week integrated training program. *Journal of Athletic Training*. National Athletic Trainers Association; 2014;49:163–72.
24. Huang P, Lin C. Effects of balance training combined with plyometric exercise in postural control: Application in individuals with functional ankle instability. *Springer*; 2010. p. 232–5.

25. Jafari M, Zolaktaf V, Marandi SM. Determination of the best pre-jump height for improvement of two-legged vertical jump. *International journal of preventive medicine*. Wolters Kluwer--Medknow Publications; 2013;4:S104.
26. Jiménez-Reyes P, Samozino P, Morin J-B. Optimized training for jumping performance using the force-velocity imbalance: Individual adaptation kinetics. *PloS one*. Public Library of Science San Francisco, CA USA; 2019;14:e0216681.
27. Jiménez-Reyes P, Samozino P, Brughelli M, Morin J-B. Effectiveness of an individualized training based on force-velocity profiling during jumping. *Frontiers in physiology*. Frontiers; 2017;677.
28. Kamalakkannan K, Azeem K, Arumugam C. The effect of aquatic plyometric training with and without resistance on selected physical fitness variables among volleyball players. *Journal of Physical Education and Sport*. Universitatea din Pitesti; 2011;11:205.
29. Kamandulis S, Snieckus A, Venckunas T, Aagaard P, Masiulis N, Skurvydas A. Rapid increase in training load affects markers of skeletal muscle damage and mechanical performance. *The Journal of Strength & Conditioning Research*. LWW; 2012;26:2953–61.
30. Kamandulis S, Skurvydas A, Brazaitis M, Stanislovaitis A, Duchateau J, Stanislovaitienė J. Effect of a periodized power training program on the functional performances and contractile properties of the quadriceps in sprinters. *Research quarterly for exercise and sport*. Taylor & Francis; 2012;83:540–5.
31. Kasmi S, Zouhal H, Hammami R, Clark CC, Hackney AC, Hammami A, et al. The Effects of Eccentric and Plyometric Training Programs and Their Combination on Stability and the Functional Performance in the Post-ACL-Surgical Rehabilitation Period of Elite Female Athletes. *Frontiers in Physiology*. Frontiers Media SA; 2021;12:688385.
32. Katsikari K, Bassa E, Skoufas D, Lazaridis S, Kotzamanidis C, Patikas DA. Kinetic and kinematic changes in vertical jump in prepubescent girls after 10 weeks of plyometric training. *Pediatric Exercise Science*. Human Kinetics; 2020;32:81–8.
33. Keller S, Koob A, Corak D, von Schöning V, Born D-P. How to improve change-of-direction speed in junior team sport athletes—horizontal, vertical, maximal, or explosive strength training? *The Journal of Strength & Conditioning Research*. LWW; 2020;34:473–82.
34. Kukrić A, Karalejić M, Jakovljević S, Petrović B, Mandić R. Impact of different training methods to the maximum vertical jump height in junior basketball players. *Fizička kultura*. 2012;66:25–31.
35. Lievens M, Bourgois JG, Boone J. Periodization of Plyometrics: Is There an Optimal Overload Principle? *Journal of Strength and Conditioning Research*. Wolters Kluwer; 2021;35:2669–76.
36. Lindberg K, Solberg P, Rønnestad BR, Frank MT, Larsen T, Abusdal G, et al. Should we individualize training based on force-velocity profiling to improve physical performance in athletes? *Scandinavian Journal of Medicine & Science in Sports*. Wiley Online Library; 2021;31:2198–210.
37. Lloyd RS, Radnor JM, Croix MBDS, Cronin JB, Oliver JL. Changes in sprint and jump performances after traditional, plyometric, and combined resistance training in male youth pre-and post-peak height velocity. *The Journal of Strength & Conditioning Research*. LWW; 2016;30:1239–47.
38. Lyttle AD, Wilson GJ, Ostrowski KJ. Enhancing performance: Maximal power versus combined weights and plyometrics training. *Journal of strength and conditioning research*. HUMAN KINETICS PUBLISHERS, INC.; 1996;10:173–9.
39. Mero AM, Häkkinen K, Kyröläinen H, Mero AA. Effects of training on bone metabolism in young athletes. *Human Movement*. Termedia; 2021;22:105–12.
40. Myklebust G, Engebretsen L, Brækken IH, Skjølberg A, Olsen O-E, Bahr R. Prevention of anterior cruciate ligament injuries in female team handball players: a prospective intervention study over three seasons. *Clinical journal of sport medicine*. LWW; 2003;13:71–8.
41. Ogiso K, Miki S. Consecutive rebound jump training with electromyostimulation of the calf muscle efficiently improves jump performance. *Translational Sports Medicine*. Wiley Online Library; 2020;3:454–63.

42. Pamuk O, Hancı E, Ucar N, Hasanlı N, Gundogdu A, Ozkaya YG. Exercícios Pliométricos Resistidos Aumentam a Força Muscular em Jovens Jogadores de Basquetebol. *Revista Brasileira de Medicina do Esporte. SciELO Brasil*; 2022;28:331–6.
43. Radnor JM, Lloyd RS, Oliver JL. Individual response to different forms of resistance training in school-aged boys. *Journal of strength and conditioning research. Wolters Kluwer*; 2017;31:787–97.
44. Ramirez-Campillo R, Sanchez-Sanchez J, Gonzalo-Skok O, Rodríguez-Fernandez A, Carretero M, Nakamura FY. Specific changes in young soccer player's fitness after traditional bilateral vs. unilateral combined strength and plyometric training. *Frontiers in physiology. Frontiers Media SA*; 2018;9:265.
45. Rhea MR, Peterson MD, Lunt KT, Ayllón FN. The effectiveness of resisted jump training on the VertiMax in high school athletes. *The Journal of Strength & Conditioning Research. LWW*; 2008;22:731–4.
46. Rhea MR, Peterson MD, Oliverson JR, Ayllón FN, Potenziano BJ. An examination of training on the VertiMax resisted jumping device for improvements in lower body power in highly trained college athletes. *The Journal of Strength & Conditioning Research. LWW*; 2008;22:735–40.
47. de Villarreal ES, Suarez-Arrones L, Requena B, Haff GG, Veliz RR. Enhancing performance in professional water polo players: dryland training, in-water training, and combined training. *The Journal of Strength & Conditioning Research. LWW*; 2015;29:1089–97.
48. de Villarreal ES, Requena B, Izquierdo M, Gonzalez-Badillo JJ. Enhancing sprint and strength performance: combined versus maximal power, traditional heavy-resistance and plyometric training. *Journal of science and medicine in sport. Elsevier*; 2013;16:146–50.
49. de Villarreal ESS, Izquierdo M, Gonzalez-Badillo JJ. Enhancing jump performance after combined vs. maximal power, heavy-resistance, and plyometric training alone. *The Journal of Strength & Conditioning Research. LWW*; 2011;25:3274–81.
50. Sanchez-Sanchez J, Ramirez-Campillo R, Petisco C, Hernandez D, Nakamura FY. Effects of short-term strength and jumping exercises distribution on soccer player's physical fitness. *Kinesiology. Kineziološki fakultet*; 2021;53:236–44.
51. Sánchez-Sixto A, Harrison AJ, Floría P. Effects of Plyometric vs. Combined Plyometric Training on Vertical Jump Biomechanics in Female Basketball Players. *Journal of Human Kinetics. 2021*;77:25–35.
52. Simpson A, Waldron M, Cushion E, Tallent J. Optimised force-velocity training during pre-season enhances physical performance in professional rugby league players. *Journal of Sports Sciences. Taylor & Francis*; 2021;39:91–100.
53. Siti MI, Saat MI, Krasilshchikov O, Shaw I, Shaw BS. Enhancing jump ground reaction forces in children through jump training. *South African Journal for Research in Sport, Physical Education and Recreation. North-West University*; 2014;36:199–209.
54. Smilios I, Sotiropoulos K, Christou M, Douda H, Spaias A, Tokmakidis SP. Maximum power training load determination and its effects on load-power relationship, maximum strength, and vertical jump performance. *The Journal of Strength & Conditioning Research. LWW*; 2013;27:1223–33.
55. Zaras ND, Angeliki-nikoletta ES, Krase AA, Methenitis SK, Karampatsos GP, Georgiadis GV, et al. Effects of tapering with light vs. heavy loads on track and field throwing performance. *The Journal of Strength & Conditioning Research. LWW*; 2014;28:3484–95.
